## **Onchocerciasis Elimination Mapping in Tanzania Mainland: A case of Kilindi DC, Handeni DC and Kilolo DC, Iringa DC.**

Evangelina Chihoma<sup>1\*#</sup>, Stephen G. Mbwambo<sup>2\*#</sup>, Ezekiel Moirana<sup>2#</sup>, Casmil Masayi<sup>1</sup>, Julius Masanika<sup>1</sup>, Shabbir Lalji<sup>1</sup>, Kathlyn Crowley<sup>3</sup>, Rory Post<sup>4</sup>, Darin Evans<sup>5</sup>, Moses Katarwa<sup>3</sup>, Upendo Mwingira<sup>3</sup> and George Kabona<sup>2</sup>

"This manuscript has been withdrawn by the authors as they did not obtain the necessary ethical clearance for the study. Therefore, the authors do not wish this work to be cited as reference for the project. If you have any questions, please contact the corresponding author."
